# Supplementary material
Source: PubMed Central journal article supplement (PMC1913789)
Supplement: plntphys_pp.107.095737_1.pdf [file plntphys_pp.107.095737_1.pdf]

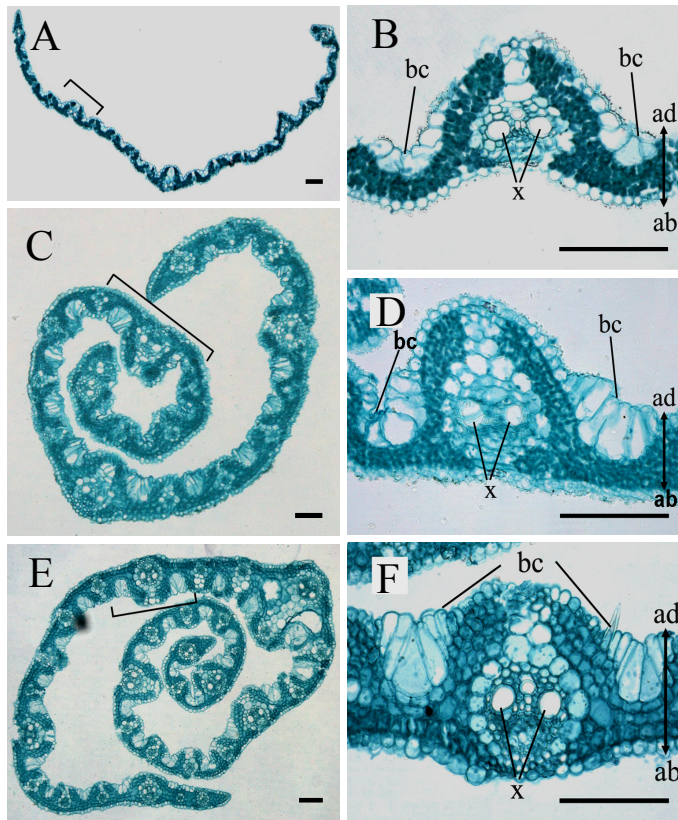

Figure S1. Transverse-section of leaves from wild type (A, B), *YAB3* RNAi (C, D) and *WOX3* over-expression (E, F) plants. A, C and E. Transverse sections of young leaf blades. B, D and F, Enlarged view of the regions indicated by the brackets in A, C and E, respectively. ad, adaxial; ab, abaxial; bc, bulliform cell; x, xylem. Bar=250 μm
