# Supplementary material
Source: PubMed Central journal article supplement (PMC1913789)
Supplement: plntphys_pp.107.095737_2.pdf [file plntphys_pp.107.095737_2.pdf]

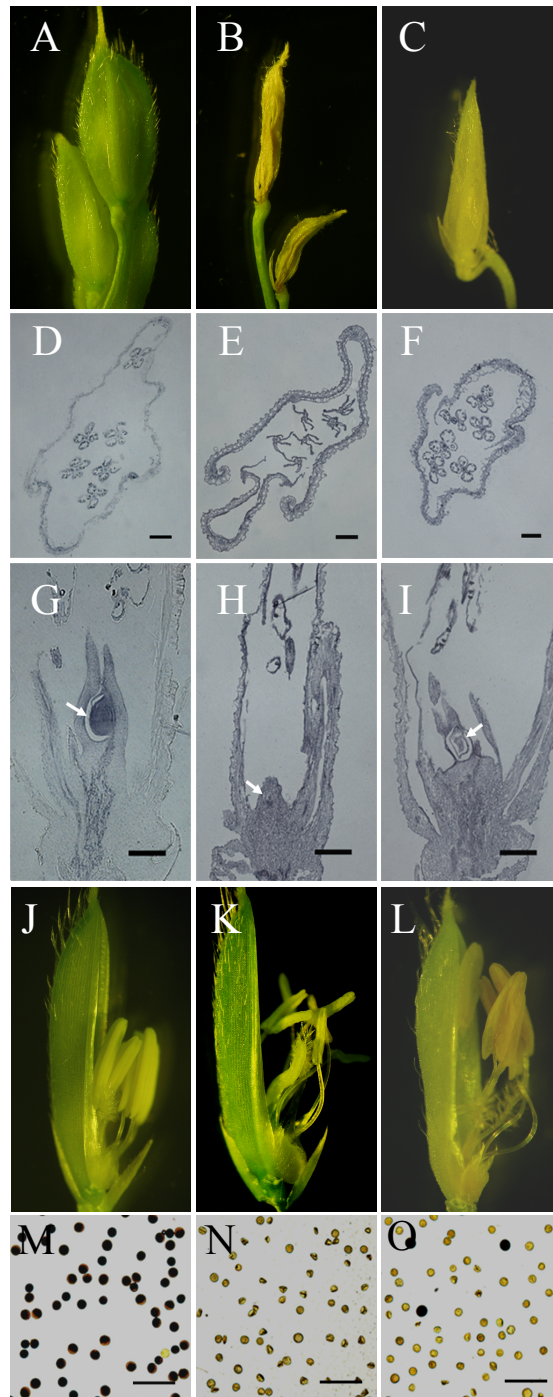

Figure S2. Floral phenotypes in *YAB3* RNAi- and *WOX3* overexpression plants. A to C, Morphology of a wild type (A), a severe phenotypic *YAB3* RNAi (B) and a *WOX3* over-expression glumes (C). Transverse sections (D to F) and longitudinal sections (G to I) of the florets showing degenerated anther and ovary structures in the transgenic plants. D and G. wild type; E and H, *YAB3* RNAi. F and I. *WOX3* over-expression florets. Arrows indicate the position of ovules. J to L. comparison of florets in wild type (J), mild phenotypic *YAB3* RNAi (K) and *WOX3* over-expression plants (L). Pollens of wild type (M), *YAB3* RNAi (N) and *WOX3* over-expression (O) florets were stained with a solution containing 0.67% potassium iodide and 0.33% iodine. Bars=200 mm in D to I and 100 mm in M to O.
