# Supplementary material
Source: PubMed Central journal article supplement (PMC1913789)
Supplement: plntphys_pp.107.095737_3.pdf [file plntphys_pp.107.095737_3.pdf]

A

-TTAATGG- Forth *YAB3* intron (522-528)  
| | | | | | | |  
TTAATGG WUS/QHB binding site

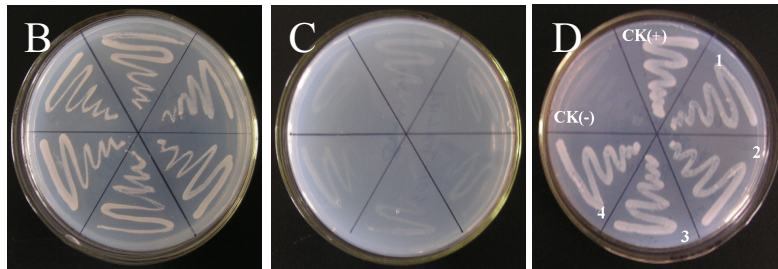

Figure S3. One-hybrid analysis of binding of WOX3 to *YAB3*  
A. Comparison of a sequence in the *YAB3* gene to the known QHB/WUS binding site. Positions relative to the ATG codon are indicated in parenthesis.  
B and C. Growth of yeast cells transformed with pYAB3::HIS2 in SD/Leu-/Trp-/His- media supplemented with 0 mM (B) or 60 mM (C) 3-AT.  
D. Growth of pYAB3::HIS2 containing cells transformed with WOX3 fused to GAL4 activation domain (pGADRec2-WOX3) (1-4) on the SD/Trp-/Leu-/His- media supplemented with 60 mM 3-AT, in the presence of a positive CK(+) and a negative CK (-) controls provided with the assay kit.
