# Supplementary material
Source: PubMed Central journal article supplement (PMC1913789)
Supplement: plntphys_pp.107.095737_4.pdf [file plntphys_pp.107.095737_4.pdf]

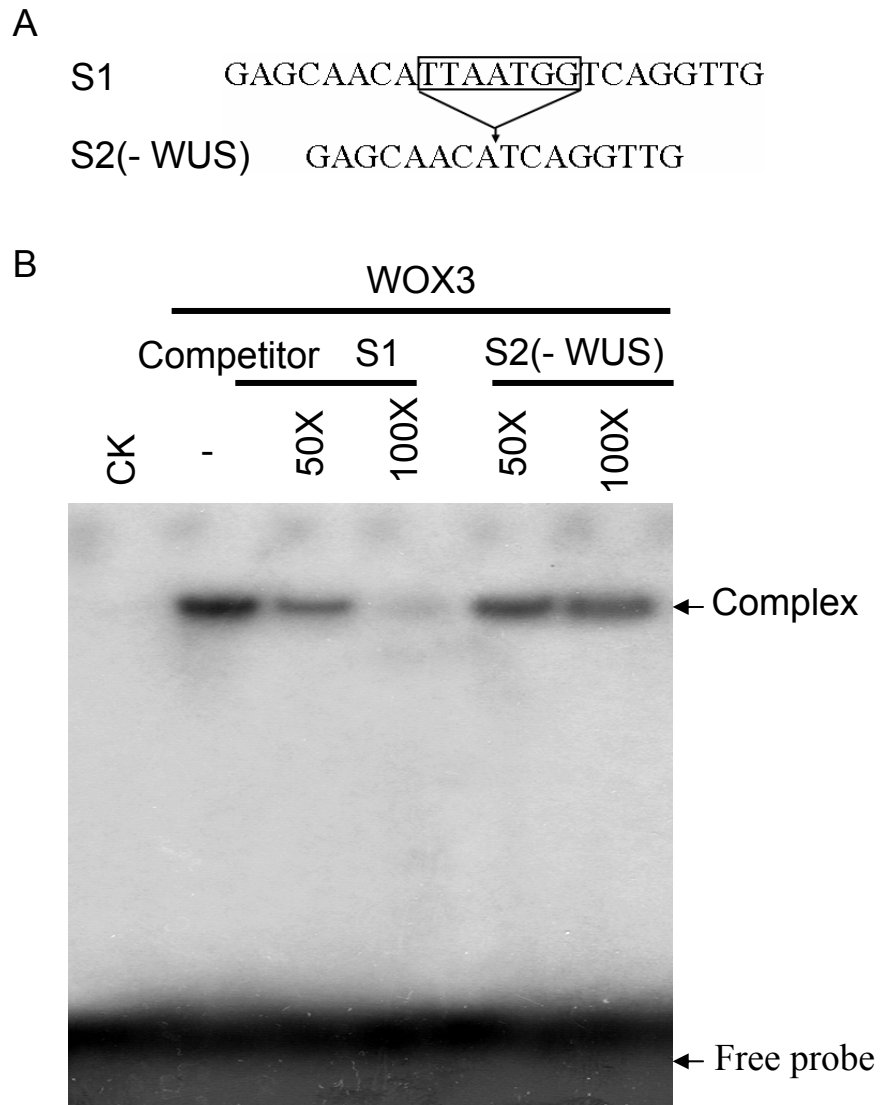

Figure S4. Gel shift analysis of WOX3 binding to *YAB3* gene.

A. DNA sequences used as probes in gel shift assays.

B. Gel shift assays with *E. coli*-produced WOX3 protein and <sup>32</sup>P-labelled S1 DNA in the presence or absence of 50 to 100 molar excess of cold competitors of wild type or mutated S1 sequences as indicated.
